# Supplementary material for: Influence of Vectors’ Risk-Spreading Strategies and Environmental Stochasticity on the Epidemiology and Evolution of Vector-Borne Diseases: The Example of Chagas’ Disease
Source: PubMed Central journal article supplement (PMC3738595; doi:10.1371/journal.pone.0070830), 2013-08-08

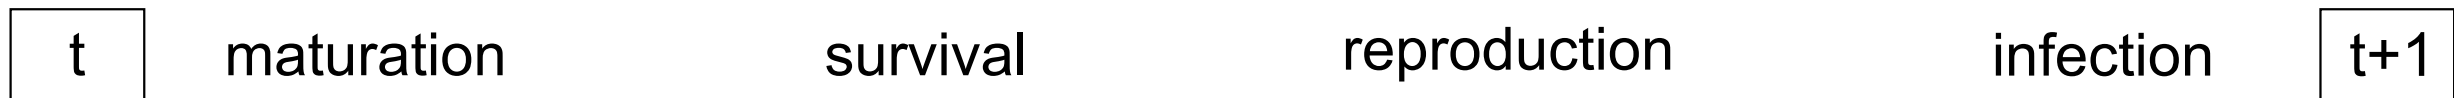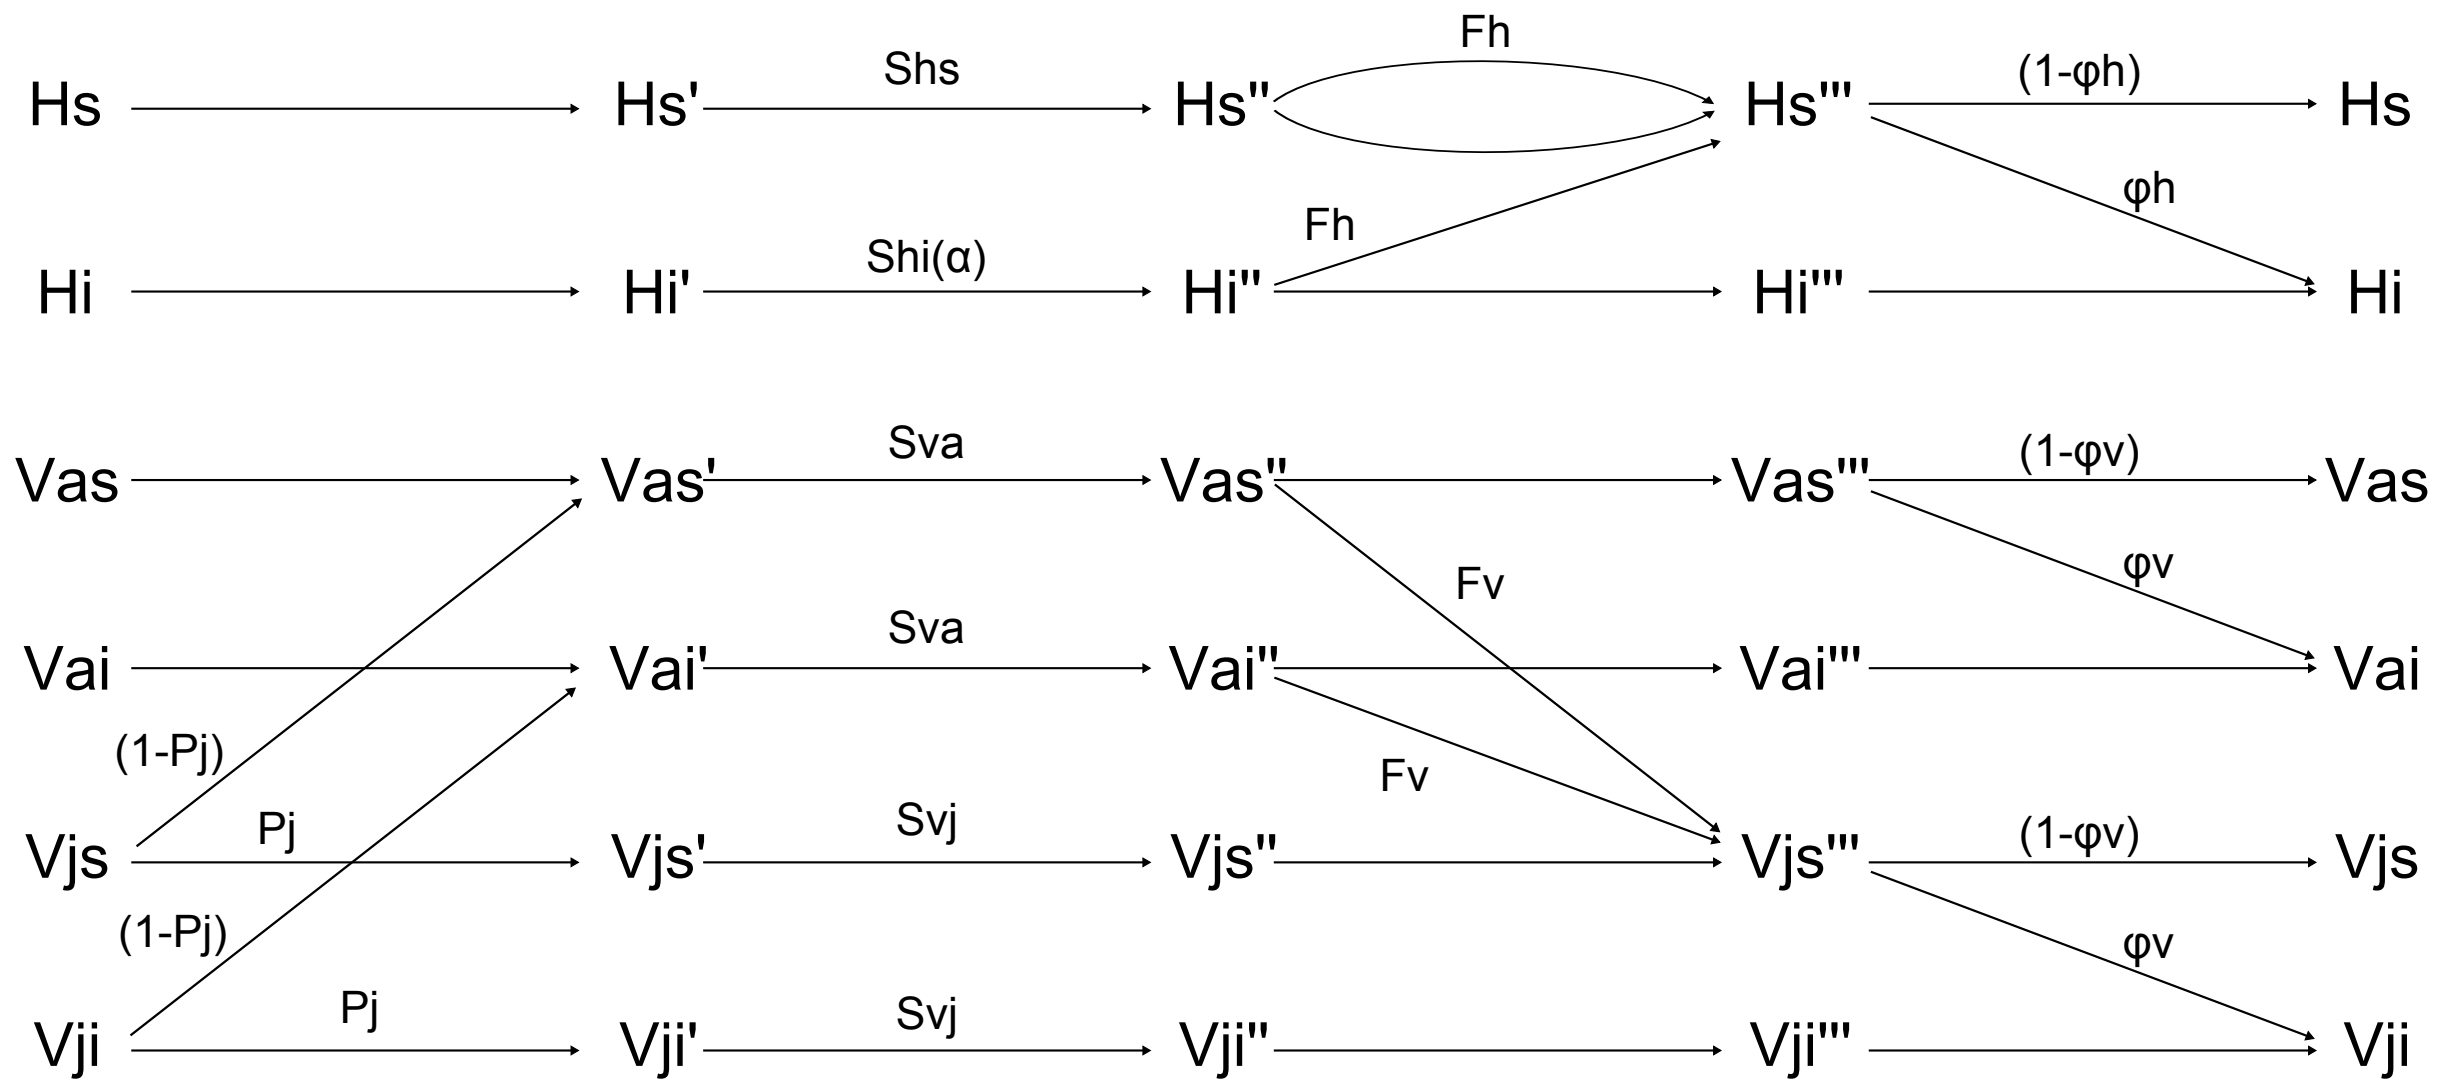

Supplement: pone.0070830.s001.pdf [file pone.0070830.s001.pdf]
