# Supplementary material for: Influence of Vectors’ Risk-Spreading Strategies and Environmental Stochasticity on the Epidemiology and Evolution of Vector-Borne Diseases: The Example of Chagas’ Disease
Source: PubMed Central journal article supplement (PMC3738595; doi:10.1371/journal.pone.0070830), 2013-08-08
Supplement: pone.0070830.s002.pdf [file pone.0070830.s002.pdf]

# Deterministic

$P_j=0.3$

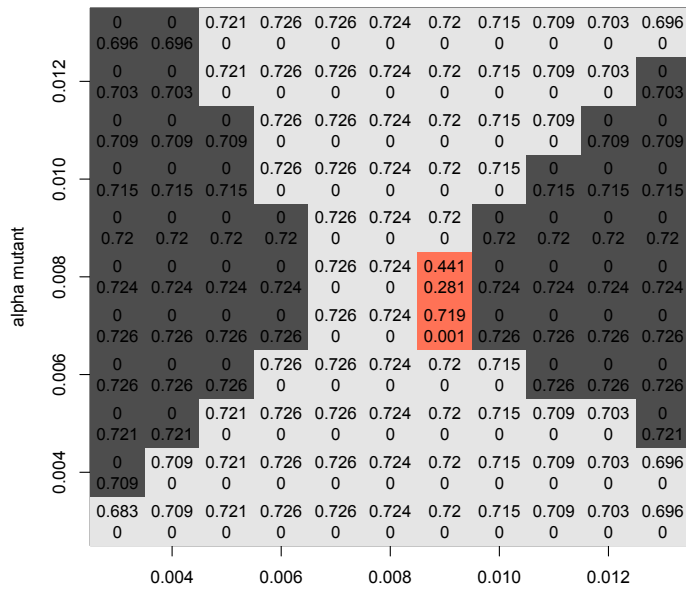

alpha resident

$P_j=0.8$

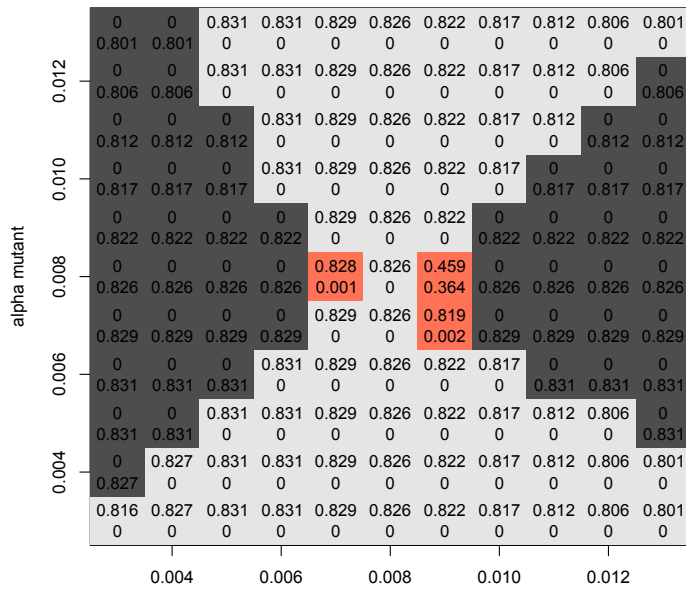

alpha resident

# Stochastic

alpha mutant

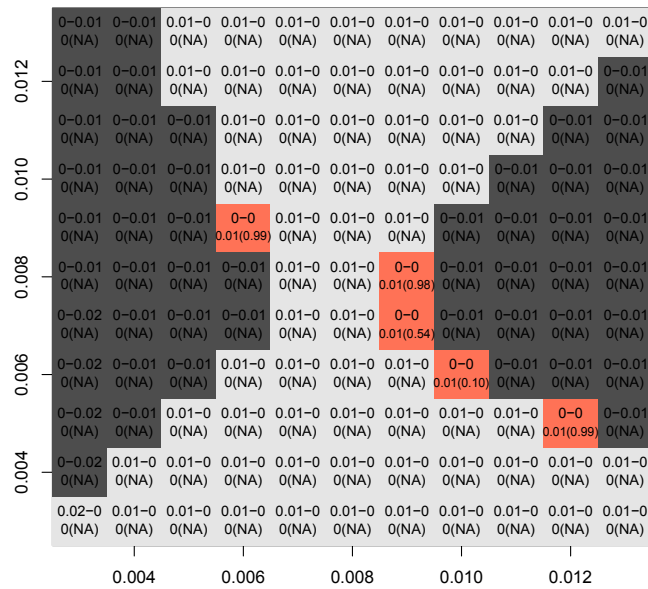

alpha resident

alpha mutant

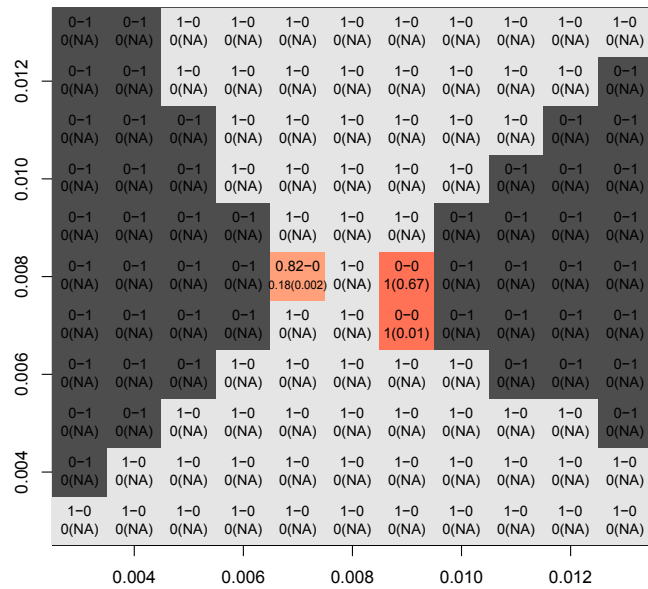

alpha resident
